# Supplementary material
Source: PubMed Central journal article supplement (PMC3956531)
Supplement: cc-13-353-s01.pdf [file cc-13-353-s01.pdf]

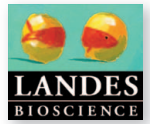

## **Supplemental Material to:**

**Anguraj Sadanandam, Xin Wang, Felipe de Sousa E Melo,  
Joe W Gray, Louis Vermeulen, Douglas Hanahan,  
and Jan Paul Medema**

**Reconciliation of classification systems defining molecular  
subtypes of colorectal cancer: Interrelationships and  
clinical implications**

**Cell Cycle 2014; 13(3)**

**<http://dx.doi.org/10.4161/cc.27769>**

**<http://www.landesbioscience.com/journals/cc/article/27769>**

Figure 1

**A**

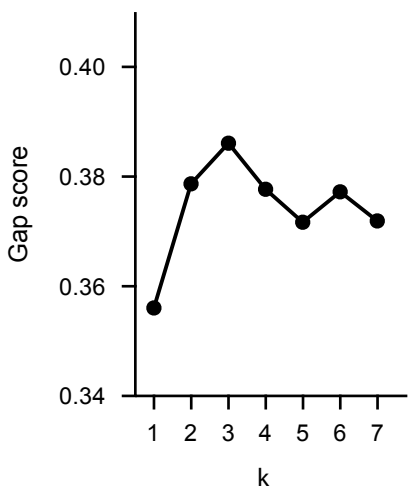

**B**

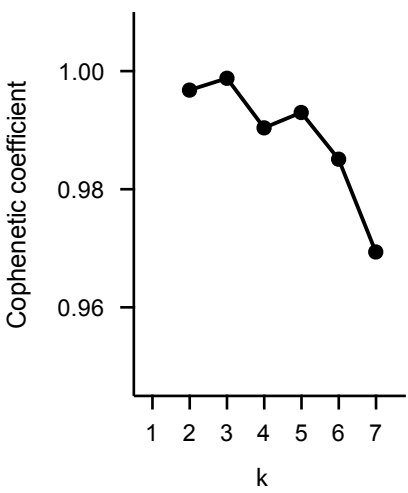

**Supplementary Figure 1** Determining the number of CRC subtypes

(**A,B**) Graphs illustrate the Gap score (**A**) and the cophenetic coefficient (CC) (**B**) for different cluster numbers ( $k$ ) for the AMC-AJCCII-90 set and the Sadanandam *et al.* core dataset.
